# Supplementary material for: Characterizing Binding Interactions That Are Essential for Selective Transport through the Nuclear Pore Complex
Source: MDPI journal article supplement (doi:10.3390/ijms221910898), 2021-10-08
Supplement: s1 [file s1]

# Supplemental Information

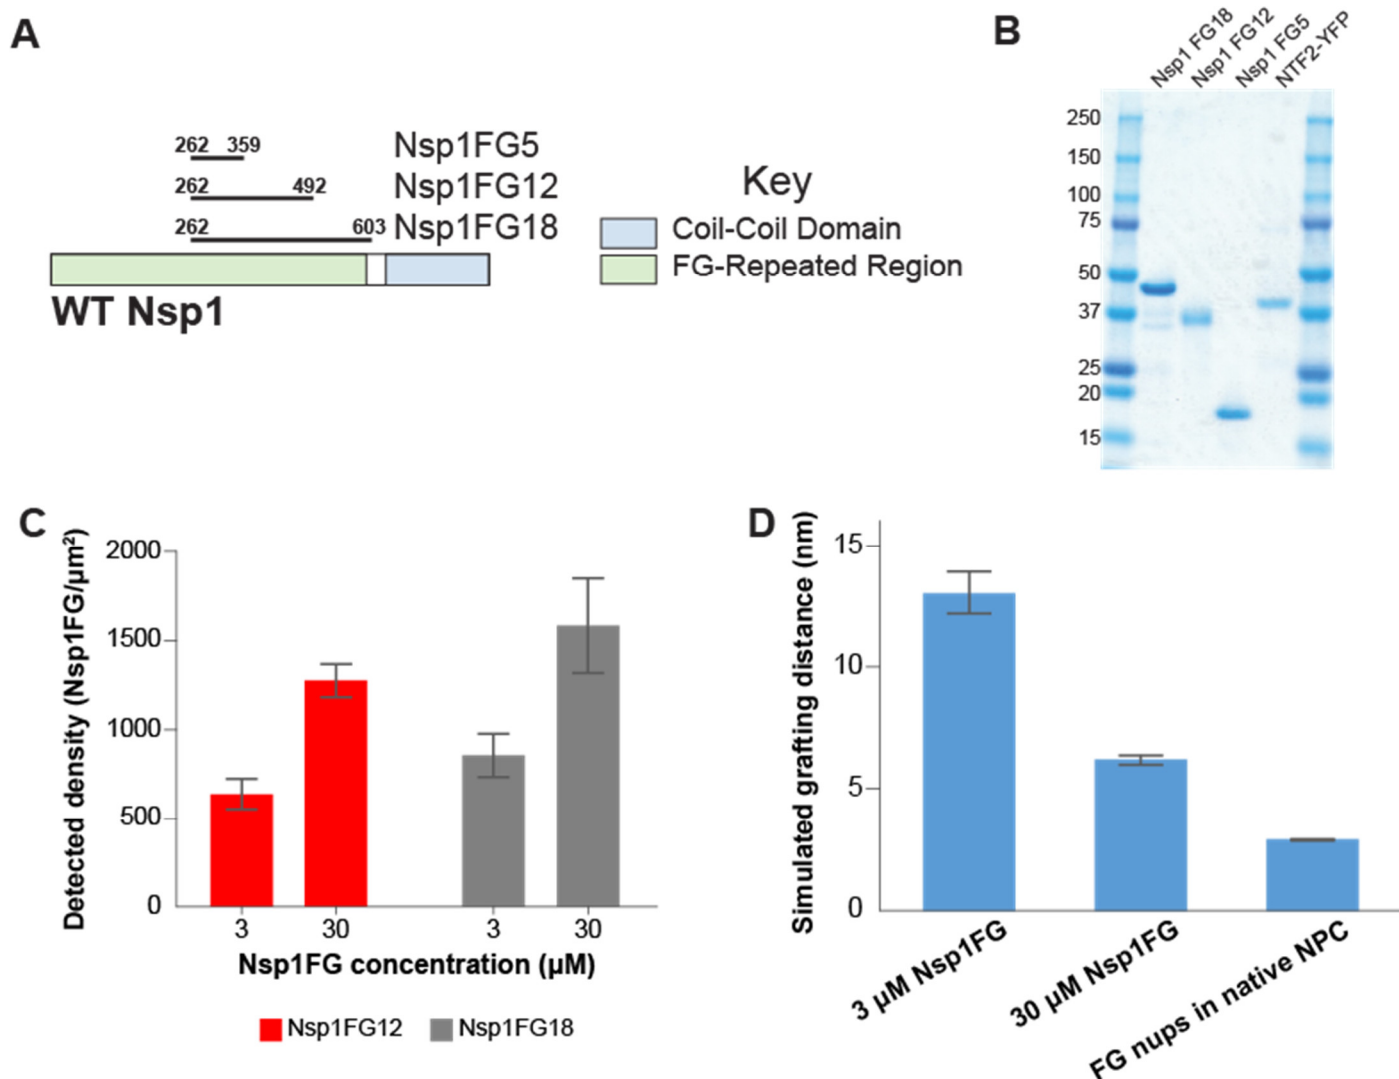

**Figure S1. Average detected densities of Nsp1FG variants.** (A) Scheme of Nsp1 fragments. (B) Nsp1 variants for surface attachment were highly purified, as confirmed with Coomassie blue stained SDS-PAGE gel. (C) Nsp1FG variants spanned the FxFG region of the WT Nsp1 FG Nup. (C) The average detected density of Nsp1FG12 and Nsp1FG18 surfaces. Error bars represent SEM. The Nsp1FG12 (3 μM) surface was assessed with 3 independent measurements, n=15 ROIs. The Nsp1FG12 (30 μM) surface was assessed with 4 independent measurements, n=20 ROIs. The Nsp1FG18 (3 μM) surface was assessed with 2 independent measurements, n=10 ROIs. The Nsp1FG18 (30 μM) surface was assessed with 2 independent measurements, n=10 ROIs. There is no difference between the Nsp1FG12 and Nsp1FG18 surfaces (3 μM or 30 μM, p-values 0.54 and 0.61 respectively) (D) Simulated grafting distances for Nsp1FG surfaces (based on 3 μM and 30 μM detected surface densities; n= 15 simulations) and for FG nups in native NPC. Native NPC grafting distance simulation was based on 160 proteins/NPC (with the surface area of the pore being roughly 0.01137 μm<sup>2</sup>)[6, 22] or ~14000 proteins/μm<sup>2</sup> FG nup density within the pore; n=15 simulations. Error bars represent SEM.

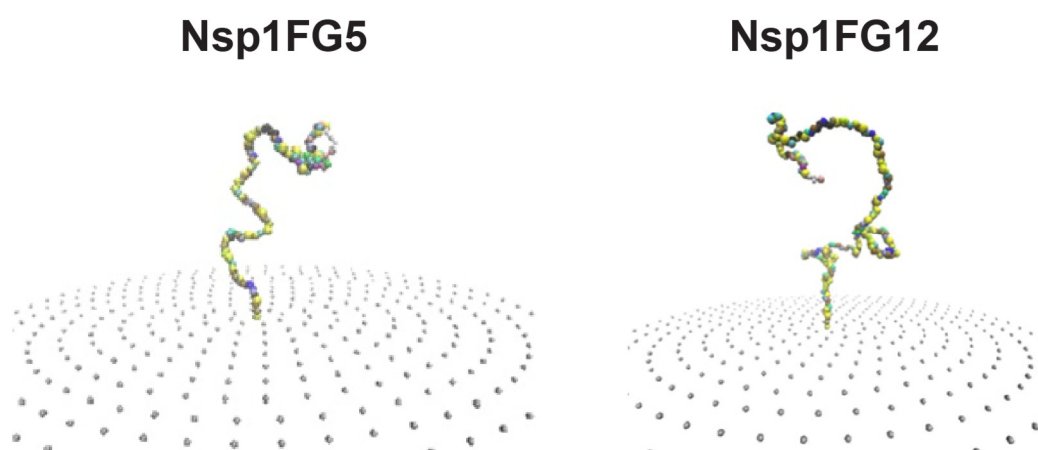

**Figure S2.** Snapshots of coarse-grained simulations of Nsp1 molecules.

**A**

|                              | # of FGs            | Charge pH7.0 | Molecular Weight (kDa) |
|------------------------------|---------------------|--------------|------------------------|
| Nsp1FG5                      | 5 (1 FG, 4 FSFG)    | 3.6          | 15.6                   |
| Nsp1FG12                     | 12 (1 FG, 11 FSFG)  | 6.6          | 29.5                   |
| Nsp1FG18                     | 18 (3 FG, 15 FSFG)  | 3.7          | 41.1                   |
| Nsp1FG full domain (aa1-620) | 30 (13 FG, 17 FSFG) | 9.0          | 63.6                   |

**B**

|          | 30 $\mu$ M Surfaces |                            |                           |                            |                           | 3 $\mu$ M Surfaces         |                           |                            |                           |
|----------|---------------------|----------------------------|---------------------------|----------------------------|---------------------------|----------------------------|---------------------------|----------------------------|---------------------------|
|          | NTF2 WT             |                            |                           | NTF2 W7AI64A               |                           | NTF2 WT                    |                           | NTF2 W7AI64A               |                           |
|          | $K_d$ (nM)          | $K_{d,10\%BSA}$ ( $\mu$ M) | $K_{d,10\%YL}$ ( $\mu$ M) | $K_{d,10\%BSA}$ ( $\mu$ M) | $K_{d,10\%YL}$ ( $\mu$ M) | $K_{d,10\%BSA}$ ( $\mu$ M) | $K_{d,10\%YL}$ ( $\mu$ M) | $K_{d,10\%BSA}$ ( $\mu$ M) | $K_{d,10\%YL}$ ( $\mu$ M) |
| Nsp1FG5  | 200 $\pm$ 21        | 15.3 $\pm$ 1.2             | 8.7 $\pm$ 2.7             | 3.2 $\pm$ 0.8              | No Binding                | 8.1 $\pm$ 1.1              | No Binding                | 1.1 $\pm$ 0.6              | No Binding                |
| Nsp1FG12 | 400 $\pm$ 35        | 4.4 $\pm$ 0.4              | 2.0 $\pm$ 0.5             | 7.8 $\pm$ 0.6              | No Binding                | 12.0 $\pm$ 0.8             | 25.3 $\pm$ 10.1           | 4.7 $\pm$ 0.5              | No Binding                |
| Nsp1FG18 | 300 $\pm$ 35        | 6.2 $\pm$ 0.4              | 15.7 $\pm$ 6.7            | 5.5 $\pm$ 0.6              | No Binding                | 6.5 $\pm$ 0.8              | 26.4 $\pm$ 9.0            | No Binding                 | No Binding                |

**C**

|          | 30 $\mu$ M Surfaces |                    |                   |                    |                           | 3 $\mu$ M Surfaces |                   |                    |                   |
|----------|---------------------|--------------------|-------------------|--------------------|---------------------------|--------------------|-------------------|--------------------|-------------------|
|          | NTF2 WT             |                    |                   | NTF2 W7AI64A       |                           | NTF2 WT            |                   | NTF2 W7AI64A       |                   |
|          | $B_{max}$           | $B_{max(10\%BSA)}$ | $B_{max(10\%YL)}$ | $B_{max(10\%BSA)}$ | $K_{d,10\%YL}$ ( $\mu$ M) | $B_{max(10\%BSA)}$ | $B_{max(10\%YL)}$ | $B_{max(10\%BSA)}$ | $B_{max(10\%YL)}$ |
| Nsp1FG5  | 51.9 $\pm$ 1.1      | 41.8 $\pm$ 1.6     | 16.4 $\pm$ 2.3    | 10.7 $\pm$ 0.9     | No Binding                | 24.7 $\pm$ 1.3     | No Binding        | 3.2 $\pm$ 0.4      | No Binding        |
| Nsp1FG12 | 76.4 $\pm$ 1.3      | 55.8 $\pm$ 1.9     | 12.3 $\pm$ 0.9    | 26.6 $\pm$ 0.9     | No Binding                | 48.5 $\pm$ 1.5     | 19.3 $\pm$ 4.3    | 23.6 $\pm$ 0.9     | No Binding        |
| Nsp1FG18 | 74.7 $\pm$ 2.0      | 57.0 $\pm$ 1.5     | 24.9 $\pm$ 5.4    | 29.5 $\pm$ 1.2     | No Binding                | 32.2 $\pm$ 1.5     | 27.1 $\pm$ 5.3    | No Binding         | No Binding        |

**D**

|                                        | $K_d$ p-values |     | $B_{max}$ p-values |     |
|----------------------------------------|----------------|-----|--------------------|-----|
| WT NTF2 FG5 vs WT NTF2 FG12            | 0.001665       | *   | 1.24E-09           | *** |
| WT NTF2 FG5 vs WT NTF2 FG18            | 0.110682       | ns  | 8.5E-08            | *** |
| WT NTF2 FG12 vs WT NTF2 FG18           | 0.086368       | ns  | 0.482185           | ns  |
| WT NTF2 vs +BSA FG5                    | 5.2E-09        | *** | 0.000159           | **  |
| WT NTF2 vs +BSA FG12                   | 3.06E-07       | *** | 4.53E-07           | *** |
| WT NTF2 vs +BSA FG18                   | 1.76E-09       | *** | 5.01E-06           | *** |
| 30 WT NTF2 +BSA vs Mut NTF2 +BSA FG5   | 9.51E-07       | *** | 1.05E-10           | *** |
| 30 WT NTF2 +BSA vs Mut NTF2 +BSA FG12  | 0.000568       | **  | 1.42E-09           | *** |
| 30 WT NTF2 +BSA vs Mut NTF2 +BSA FG18  | 0.320794       | ns  | 0.020747           | *   |
| WT NTF2 +BSA 30 vs WT NTF2 +BSA 3 FG5  | 0.000748       | **  | 2.94E-06           | *** |
| WT NTF2 +BSA 30 vs WT NTF2 +BSA 3 FG12 | 1.6E-06        | *** | 0.010779           | *   |
| WT NTF2 +BSA 30 vs WT NTF2 +BSA 3 FG18 | 0.723771       | ns  | 5.95E-08           | *** |
| 3 WT NTF2 +BSA vs Mut NTF2 +BSA FG5    | 0.000158       | **  | 2.22E-08           | *** |
| 3 WT NTF2 +BSA vs Mut NTF2 +BSA FG12   | 1.08E-05       | *** | 5.63E-08           | *** |
| 3 WT NTF2 +BSA vs Mut NTF2 +BSA FG18   | 6.61E-06       | *** | 8.02E-10           | *** |
| WT NTF2 +BSA vs WT NTF2 +YL FG5        | 1.53E-05       | *** | 3.72E-09           | *** |
| WT NTF2 +BSA vs WT NTF2 +YL FG12       | 0.214234       | ns  | 7.82E-05           | *** |
| WT NTF2 +BSA vs WT NTF2 +YL FG18       | 0.052834       | *   | 0.368272           | ns  |
| 30 WT NTF2 +BSA vs WT NTF2 +YL FG5     | 0.051027       | ns  | 3.99E-06           | *** |
| 30 WT NTF2 +BSA vs WT NTF2 +YL FG12    | 0.005167       | *   | 1.62E-09           | *** |
| 30 WT NTF2 +BSA vs WT NTF2 +YL FG18    | 0.186538       | ns  | 0.000201           | **  |
| 30 WT NTF2 +YL vs 3 WT NTF2 +YL FG5    | 0.013488       | *   | 9.59E-05           | *** |
| 30 WT NTF2 +YL vs 3 WT NTF2 +YL FG12   | 0.047697       | *   | 0.146909           | ns  |
| 30 WT NTF2 +YL vs 3 WT NTF2 +YL FG18   | 0.368034       | ns  | 0.776100           | ns  |

**Table S1. NTF2-YFP Apparent  $K_d$  and Binding Capacity on Nsp1FG surfaces.** (A) The properties of Nsp1FG variants and WT Nsp1 FG domain: numbers of FG domains, charge at pH 7.0, and molecular weight (including His<sub>6</sub> tag). (B) The numerical values for the apparent  $K_d$  of NTF2-YFP and NTF2W7AI64A-YFP in buffer, with 10% BSA, or 10% yeast lysate (YL) (graphically represented in Figure 3). Errors represent SEM. (C) The numerical values for the apparent binding capacity of NTF2-YFP and NTF2W7AI64A-YFP buffer, with 10% BSA, or 10% YL (graphically represented in Figure 3). Errors represent SEM. (D) p-values for the indicated conditions were calculated using independent-samples two tailed student t-test.
